# Supplementary material for: Small-molecule Wnt inhibitors are a potential novel therapy for intestinal fibrosis in Crohns disease
Source: PubMed Central journal article supplement (PMC9583737; doi:10.1042/cs20210889), 2022-10-14
Supplement: CS-2021-0889_supp.pdf [file CS-2021-0889_supp.pdf]

## Supplementary Figures

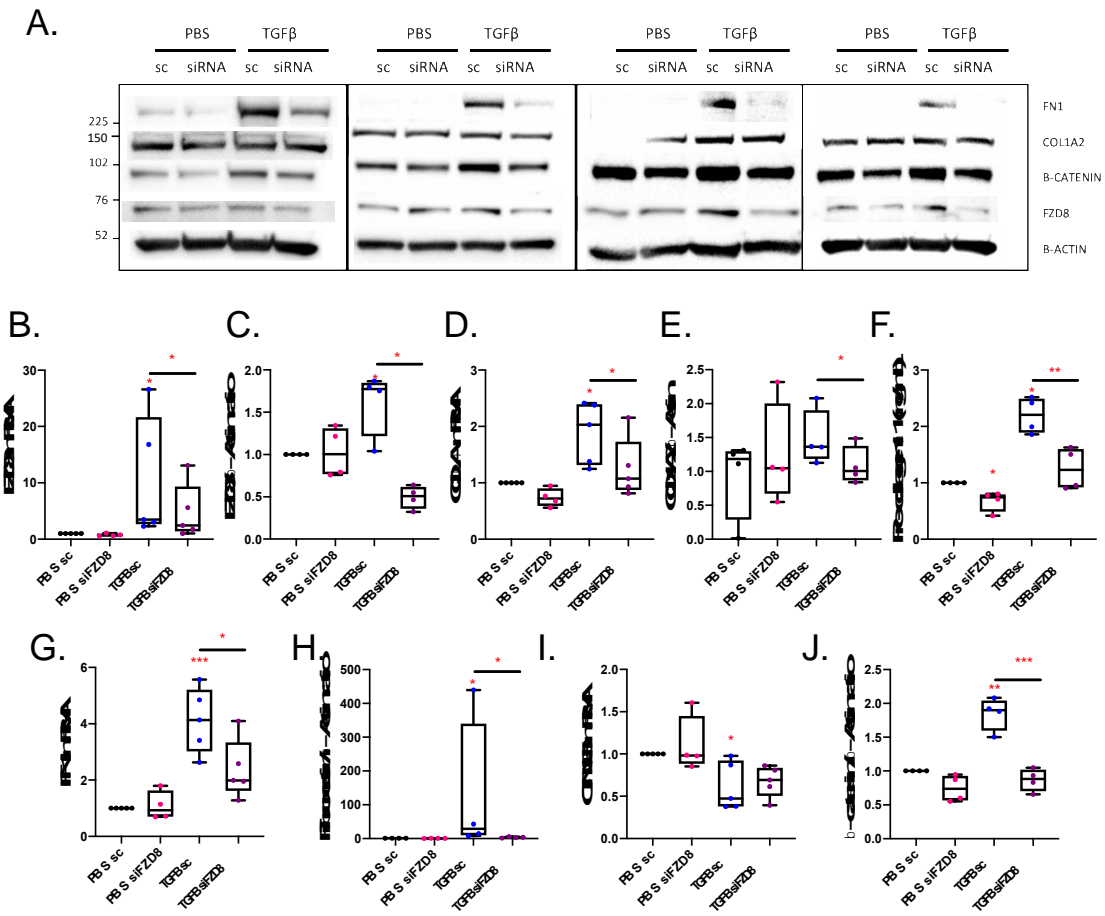

**Supplementary Figure S1.** A) Representative western blots from CCD-18Co cells transiently transfected with a scrambled (sc) non-targeting control siRNA or siRNA targeting FZD8 (siFZD8). (B-C) Successful FZD8 knockdown was confirmed by qPCR and western blot in TGFβ treated cells (n=4). (D-E) FZD8 knockdown blocked TGFβ mediated up-regulation of COL1A1 mRNA and inhibited production of Pro-collagen-1α1 protein in conditioned cell media (n=4, respectively). (F-G) FZD8 knockdown also impaired TGFβ's ability to up-regulate Fibronectin mRNA and protein (n=4, respectively). (H-I) FZD8 deficiency did not affect β-catenin (CTNNB1) mRNA levels, but did inhibit TGFβ-dependent stabilisation on β-catenin protein levels (n=4).

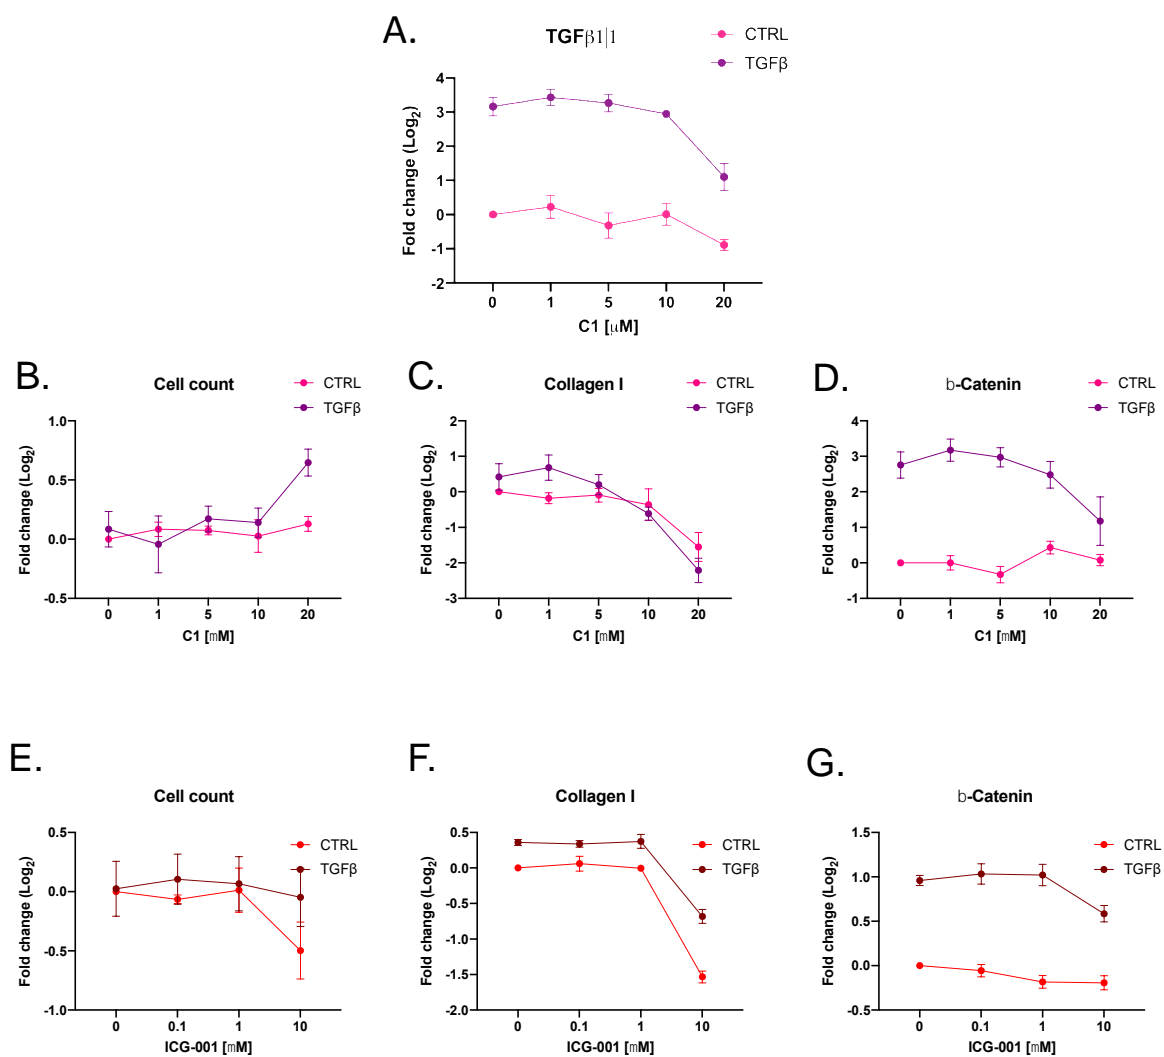

**Supplementary Figure S2.** (A) TGFβ treatment induces expression of the SMAD target TGFβ1|1. (B-D) Quantification of cell number, Collagen-I and β-catenin protein levels from IF images of CCD-18Co cells treated with C1 or (E-G) ICG-001.

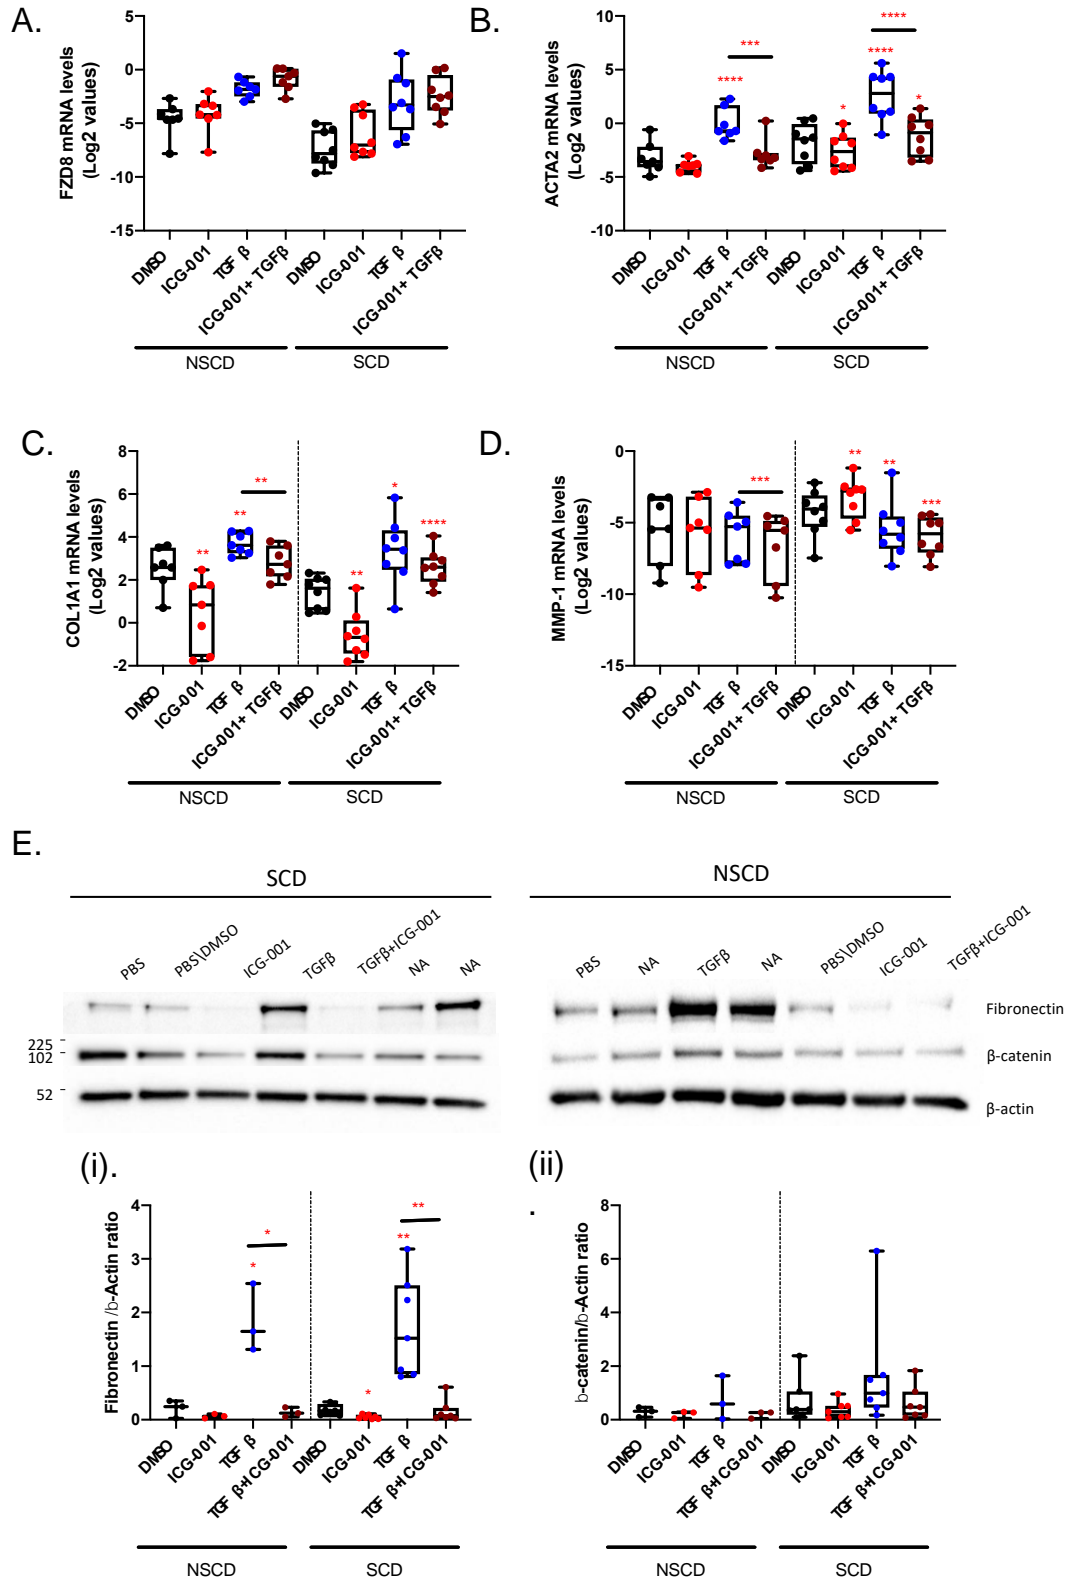

**Supplementary Figure S3.** (A-D) analysis of mRNA levels of selected genes from primary CD myofibroblasts derived from NSCD and SCD intestine. (E) western blot analysis of fibronectin and β-catenin with associated quantification of protein levels from primary CD myofibroblasts derived from NSCD and SCD intestine.

## Supplementary Tables

**Supplementary Table S1. Stricturing CD FFPE cohort characteristics**

| Pathology ID        | AGE | Gender | Age at diagnosis | Montreal | CRP | Active disease at sample collection | Medications              | Block | Fibrosis score | ulceration score |
|---------------------|-----|--------|------------------|----------|-----|-------------------------------------|--------------------------|-------|----------------|------------------|
| 16S005439           | 26  | F      | 15               | A1L1B3   | 52  | yes                                 | thiopurine               | NSCD  | 7              | 0                |
|                     |     |        |                  |          |     |                                     |                          | SCD   | 11             | 0                |
| 16S008009           | 35  | F      | 23               | A2L1B2   | <5  | yes                                 | adalimumab, methotrexate | NSCD  | 9              | 0                |
|                     |     |        |                  |          |     |                                     |                          | SCD   | 11             | 5                |
| 10S014520           | x   | M      | 16               | A1L1L4B2 |     | yes                                 | x                        | NSCD  | 6              | 0                |
|                     |     |        |                  |          |     |                                     |                          | SCD   | 8              | 0                |
| 10s40494            | 27  | F      | 20               | A2L1B2   | <5  | no                                  | none                     | NSCD  | 6              | 0                |
|                     |     |        |                  |          |     |                                     |                          | SCD   | 10             | 0                |
| 16S042693           | 71  | F      | 63               | A3L1L4B2 | 73  | yes                                 | adalimumab               | NSCD  | 0              | 0                |
|                     |     |        |                  |          |     |                                     |                          | SCD   | 10             | 6                |
| 17S013903           | x   | x      | x                | x        | x   | x                                   | x                        | NSCD  | 5              | 0                |
|                     |     |        |                  |          |     |                                     |                          | SCD   | 12             | 6                |
| p value NSCD Vs SCD |     |        |                  |          |     |                                     |                          |       | 0.0312         | 0.125            |

\*All blocks were reviewed by a pathologist who scored the extent of ulceration and fibrosis. Difference between Non-strictured CD blocks (NSCD) and strictured CD blocks (SCD) were determined using a Wilcoxon test. CRP= C-reactive protein. X = data not available

**Supplementary Table S2. Primary CD myofibroblasts cohort characteristics**

| Sample ID | NSCD cultures (n=7) | SCD cultures (n=9) | AGE | Gender | Age at diagnosis | Montreal  | CRP | Active disease | Medications            |
|-----------|---------------------|--------------------|-----|--------|------------------|-----------|-----|----------------|------------------------|
| 19RLH017  | 0                   | 2                  | 25  | M      | 11               | A1L3L4B1p | 20  | yes            | thiopurine             |
| 19RLH016  | 0                   | 3                  | 28  | M      | 12               | A1L3B2P   | 37  | yes            | none                   |
| 19RLH0019 | 0                   | 2                  | 35  | M      | 26               | A2L1L4B3  | 18  | yes            | adalimumab             |
| 19RLH023  | 2                   | 1                  | 27  | M      | 12               | A1L3B2p   | 13  | yes            | vedolizumab            |
| 19RLH024  | 3                   | 0                  | 24  | F      | 18               | A2L2L4B1  | 58  | yes            | none                   |
| 19RLH026  | 0                   | 1                  | 26  | F      | 16               | A1L3B3p   | 61  | yes            | adalimumab, thiopurine |
| 19RLH031  | 2                   | 0                  | 33  | M      | 16               | A1L3B1p   | 2   | No             | adalimumab, thiopurine |

\*No patients were taking steroids at the time of collection. From some patients' multiple independent strictures were harvested and cell cultures derived.

**Supplementary Table S3. Source of antibody and immuno-blotting conditions.** Dako secondary antibodies: Goat- $\alpha$ -Rabbit Immunoglobulins/HRP (DAKO, P0448), Rabbit- $\alpha$ -Mouse Immunoglobulins/HRP (DAKO, P0260), or the appropriate HRP-conjugated secondary antibodies from Jackson ImmunoResearch. ECL reagent: Supersignal West Dura (Thermo Scientific, 34075), Pierce ECL Western (Thermo Scientific, 32106) or Amersham ECL Western Blotting Detection Reagents, GE Healthcare

| Target                  | Company                      | Species | Blocking buffer | Primary Ab dilution | Secondary Ab dilution | ECL           |
|-------------------------|------------------------------|---------|-----------------|---------------------|-----------------------|---------------|
| $\beta$ -catenin        | BD Transduction, 610154      | Mouse   | 5% BSA          | 1/1000              | 1/2000, Dako          | Thermo, 32106 |
| Active $\beta$ -catenin | Cell Signalling, 8814        | Rabbit  | 5% milk         | 1/1000              | 1/2000, Dako          | Thermo, 32106 |
| Active $\beta$ -catenin | Millipore, 05-665-25UG       | Mouse   | 3% BSA          | 1/1000              | 1/20000, Jackson      | Amersham      |
| Fibronectin             | AbCam, ab154210              | Mouse   | 5% BSA          | 1/500               | 1/1000, Dako          | Thermo, 34075 |
| Fibronectin             | CHEMICON, MAB88904           | Mouse   | 3% BSA          | 1/2000              | 1/20000, Jackson      | Amersham      |
| Collagen-I              | Novus Biologicals, NB600-408 | Rabbit  | 3% BSA          | 1/2000              | 1/20000, Jackson      | Amersham      |
| FZD8                    | AbCam, ab155095              | Rabbit  | 5% BSA          | 1/500               | 1/1000, Dako          | Thermo, 34075 |
| $\beta$ -Actin          | AbCam, ab8227                | Rabbit  | 5% BSA          | 1/1000              | 1/2000, Dako          | Thermo, 32106 |
| $\beta$ -Actin          | Abgent, AM1021B              | Mouse   | 5% BSA          | 1/1000              | 1/2000, Dako          | Thermo, 32106 |
